# Supplementary material
Source: PubMed Central journal article supplement (PMC3177697)
Supplement: supp_jlb.0111043_1HI0111-043_Hong_suppl_figs_and_tables.pdf [file supp_jlb.0111043_1HI0111-043_Hong_suppl_figs_and_tables.pdf]

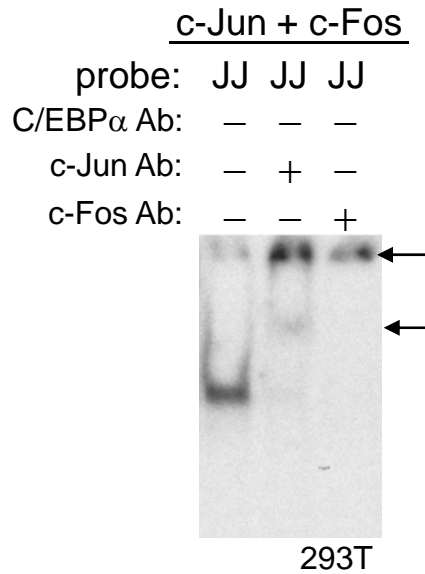

**Figure S1.** c-Jun and c-Fos expressed in 293T cells were mixed at a 1:1 ratio and incubated with radio-labelled JJ probe containing TGACGTCA. No antisera, c-Jun antisera, or c-Fos antisera was then added and samples were subjected to gel electrophoresis and autoradiography. Arrows denote super-shift bands, indicating cooperative c-Jun:c-Fos binding.

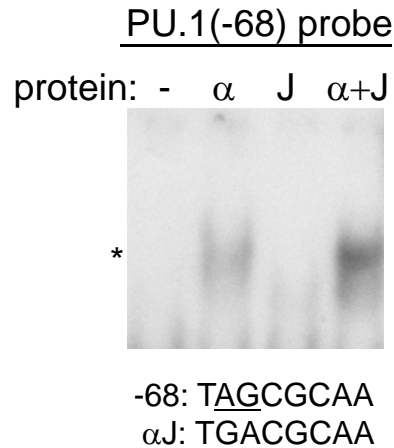

**Figure S2.** A radiolabeled oligonucleotide centered at -68 in the murine PU.1 promoter was subjected to gel shift assay with no protein (-) or with *in vitro* translated C/EBP $\alpha$  ( $\alpha$ ), c-Jun (J), or C/EBP $\alpha$  + c-Jun ( $\alpha$ +J, 1:8 mole ratio). The sequence of the PU.1(-68) site, which is identical in the human PU.1 promoter, is compared to the  $\alpha$ J consensus (below). Note synergistic binding of C/EBP $\alpha$  and c-Jun to this site functional in the PU.1 promoter.

probe: TGATGCAA TGTTGCAA TGACGCAA  
protein:  $\alpha$  J  $\alpha$ +J  $\alpha$  J  $\alpha$ +J  $\alpha$  J  $\alpha$ +J

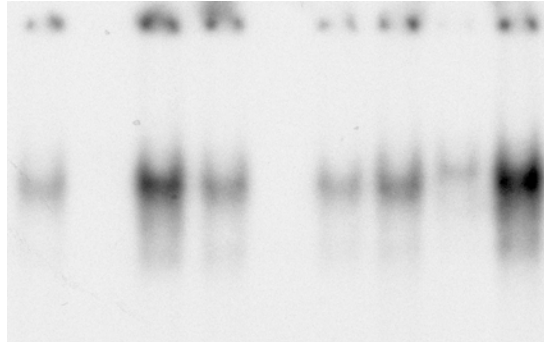

**Figure S3.** *In vitro* translated, myc-tagged C/EBP $\alpha$  ( $\alpha$ ), c-Jun (J), or C/EBP $\alpha$ +c-Jun ( $\alpha$ +J, at a 1:8 ratio) were used in gel shift reactions with the consensus  $\alpha$ J probe containing TGACGCAA (right lanes) or with these base pairs replaced by TGATGCAA or TGTTGCAA (left or center lanes). Note synergistic binding to either TGACGCAA or TGATGCAA and stronger C/EBP $\alpha$  + c-Jun binding to TGACGCAA.

**Table S1** – Human genes harboring TGACGCAA between -2 kb to + 1 kb

| <b>Chromosome</b> | <b>Strand</b> | <b>Position</b> | <b>Gene name</b> | <b>Descriptive name</b>                                              |
|-------------------|---------------|-----------------|------------------|----------------------------------------------------------------------|
| 1                 | +             | 15676474        | ELA2B            | elastase family member 2B                                            |
| 1                 | -             | 19409404        | ZUBR1            | ubiquitin protein ligase 3 component                                 |
| 1                 | +             | 148305958       | VPS45A           | vacuolar protein sorting 45A                                         |
| 1                 | -             | 926141          | HES4             | hairy and enhancer of split 4 (Drosophila)                           |
| 1                 | +             | 1387682         | ATAD3C           | ATPase family, AAA domain containing 3C                              |
| 1                 | -             | 3808366         | C1orf174         | chromosome 1 open reading frame 174                                  |
| 1                 | -             | 10948419        | C1orf127         | chromosome 1 open reading frame 127                                  |
| 1                 | -             | 10974173        | LOC390996        | cofilin-1-like                                                       |
| 1                 | +             | 10994630        | TARDBP           | TAR DNA binding protein                                              |
| 1                 | -             | 11083561        | EXOSC10          | exosome component 10                                                 |
| 1                 | +             | 12629080        | AADACL4          | arylacetamide deacetylase-like 4                                     |
| 1                 | -             | 15723467        | CASP9            | caspace 9, apoptosis-related cysteine peptidase                      |
| 1                 | +             | 15724122        | DNAJC16          | DnaJ (Hsp40) homolog, subfamily C, member 16                         |
| 1                 | +             | 15957378        | FBLIM1           | filamin binding LIM protein 1                                        |
| 1                 | +             | 21640433        | NBPF3            | neuroblastoma breakpoint family, member 3                            |
| 1                 | +             | 22852461        | C1QB             | complement component 1, q subcomponent, B chain                      |
| 1                 | -             | 23394575        | HTR1D            | 5-hydroxytryptamine (serotonin) receptor 1D                          |
| 1                 | +             | 23890547        | RPL11            | ribosomal protein L11                                                |
| 1                 | -             | 25165925        | RUNX3            | runt-related transcription factor 3                                  |
| 1                 | +             | 26221388        | EXTL1            | exostoses (multiple)-like 1                                          |
| 1                 | -             | 33274200        | AK2              | adenylate kinase 2                                                   |
| 1                 | +             | 36462460        | THRAP3           | thyroid hormone receptor associated protein 3                        |
| 1                 | -             | 36702630        | MRPS15           | mitochondrial ribosomal protein S15                                  |
| 1                 | +             | 40495647        | ZMPSTE24         | zinc metallopeptidase (STE24 homolog, <i>S. cerevisiae</i> )         |
| 1                 | +             | 40689274        | ZNF643           | zinc finger protein 643                                              |
| 1                 | +             | 44216574        | B4GALT2          | UDP-Gal:betaGlcNAc beta 1,4- galactosyltransferase, 2                |
| 1                 | +             | 45821797        | NASP             | nuclear autoantigenic sperm protein (histone-binding)                |
| 1                 | -             | 46437708        | POMGNT1          | protein O-linked mannose b1,2-N-acetylglucosaminyl transferase       |
| 1                 | +             | 46579406        | NSUN4            | NOP2/Sun domain family, member 4                                     |
| 1                 | +             | 61892624        | MGC34796         | SPR pseudogene                                                       |
| 1                 | +             | 61980282        | INADL            | InaD-like (Drosophila)                                               |
| 1                 | +             | 70650547        | CTH              | cystathionase (cystathionine gamma-lyase)                            |
| 1                 | +             | 109067082       | FNDC7            | fibronectin type III domain containing 7                             |
| 1                 | -             | 114855504       | TRIM33           | tripartite motif-containing 33                                       |
| 1                 | +             | 115198155       | SYCP1            | synaptonemal complex protein 1                                       |
| 1                 | -             | 116111949       | CASQ2            | calsequestrin 2 (cardiac muscle)                                     |
| 1                 | -             | 117467000       | TRIM45           | tripartite motif-containing 45                                       |
| 1                 | +             | 143806944       | SEC22B           | SEC22 vesicle trafficking protein homolog B ( <i>S. cerevisiae</i> ) |
| 1                 | +             | 147872464       | FAM91A2          | family with sequence similarity 91, member A2                        |
| 1                 | -             | 148868387       | ENSA             | endosulfine alpha                                                    |
| 1                 | +             | 152229806       | RPS27            | ribosomal protein S27                                                |
| 1                 | -             | 152866346       | ADAR             | adenosine deaminase, RNA-specific                                    |
| 1                 | -             | 154942749       | CRABP2           | cellular retinoic acid binding protein 2                             |

|   |   |           |           |                                                                       |
|---|---|-----------|-----------|-----------------------------------------------------------------------|
| 1 | + | 158017071 | DUSP23    | dual specificity phosphatase 23                                       |
| 1 | + | 159354486 | NIT1      | nitrilase 1                                                           |
| 1 | + | 161026985 | HSD17B7   | hydroxysteroid (17-beta) dehydrogenase 7                              |
| 1 | + | 181871795 | RGL1      | ral guanine nucleotide dissociation stimulator-like 1                 |
| 1 | - | 191343459 | GLRX2     | glutaredoxin 2                                                        |
| 1 | - | 196011644 | DENND1B   | DENN/MADD domain containing 1B                                        |
| 1 | - | 201163009 | KLHL12    | kelch-like 12 (Drosophila)                                            |
| 1 | + | 204484381 | CTSE      | cathepsin E                                                           |
| 1 | + | 209567456 | TRAF5     | TNF receptor-associated factor 5                                      |
| 1 | + | 234623784 | EDARADD   | EDAR-associated death domain                                          |
| 1 | + | 246149809 | OR2T8     | olfactory receptor, family 2, subfamily T, member 8                   |
| 1 | + | 246178294 | OR2L8     | olfactory receptor, family 2, subfamily L, member 8                   |
| 2 | + | 30523564  | LYCAT     | lysocardiolipid acetyltransferase 1                                   |
| 2 | + | 5751803   | SOX11     | SRY (sex determining region Y)-box 11                                 |
| 2 | - | 10507721  | ODC1      | ornithine decarboxylase 1                                             |
| 2 | + | 27202137  | ABHD1     | abhydrolase domain containing 1                                       |
| 2 | + | 46622972  | RHOQ      | ras homolog gene family, member Q                                     |
| 2 | + | 71058770  | ANKRD53   | ankyrin repeat domain 53                                              |
| 2 | + | 71147683  | NAGK      | N-acetylglucosamine kinase                                            |
| 2 | - | 75792114  | C2orf3    | chromosome 2 open reading frame 3                                     |
| 2 | - | 100293744 | LONRF2    | LON peptidase N-terminal domain and ring finger 2                     |
| 2 | + | 127131333 | GYPC      | glycophorin C (Gerbich blood group)                                   |
| 2 | - | 169597350 | ABCB11    | ATP-binding cassette, sub-family B (MDR/TAP), member 11               |
| 2 | + | 170149047 | PPIG      | peptidylprolyl isomerase G (cyclophilin G)                            |
| 2 | + | 171493187 | GORASP2   | golgi reassembly stacking protein 2, 55kDa                            |
| 2 | + | 173128570 | PDK1      | pyruvate dehydrogenase kinase, isozyme 1                              |
| 2 | - | 177837832 | NFE2L2    | nuclear factor (erythroid-derived 2)-like 2                           |
| 2 | - | 188023089 | CALCRL    | calcitonin receptor-like                                              |
| 2 | - | 216009456 | FN1       | fibronectin 1                                                         |
| 2 | - | 219882491 | PTPRN     | protein tyrosine phosphatase, receptor type, N                        |
| 2 | - | 239987736 | HDAC4     | histone deacetylase 4                                                 |
| 2 | + | 241903947 | SEPT2     | septin 2                                                              |
| 3 | + | 129927606 | RAB7      | Ras family member                                                     |
| 3 | + | 169751447 | MIRN551B  | micro-RNA 551B                                                        |
| 3 | + | 9719887   | CPNE9     | copine family member IX                                               |
| 3 | + | 16281526  | OXNAD1    | oxidoreductase NAD-binding domain containing 1                        |
| 3 | + | 42827188  | CCBP2     | chemokine binding protein 2                                           |
| 3 | + | 44780240  | KIF15     | kinesin family member 15                                              |
| 3 | + | 48931253  | ARIH2     | ariadne homolog 2 (Drosophila)                                        |
| 3 | - | 50311986  | NAT6      | N-acetyltransferase 6 (GCN5-related)                                  |
| 3 | + | 52254439  | PPM1M     | protein phosphatase, Mg <sup>2+</sup> /Mn <sup>2+</sup> dependent, 1M |
| 3 | + | 62278839  | C3orf14   | chromosome 3 open reading frame 14                                    |
| 3 | + | 75791516  | LOC643255 | retinoic acid receptor responder protein 2-like                       |
| 3 | - | 102878694 | ZBTB11    | zinc finger and BTB domain containing 11                              |
| 3 | + | 124402373 | SEC22A    | SEC22 vesicle trafficking protein homolog A (S. cerevisiae)           |
| 3 | + | 138964839 | SOX14     | SRY (sex determining region Y)-box 14                                 |
| 3 | - | 171014521 | LRRC34    | leucine rich repeat containing 34                                     |
| 3 | + | 171424056 | PRKCI     | protein kinase C, iota                                                |

|   |   |           |           |                                                                                                                 |
|---|---|-----------|-----------|-----------------------------------------------------------------------------------------------------------------|
| 3 | + | 199163205 | RPL35A    | ribosomal protein L35a                                                                                          |
| 4 | + | 123519977 | Tenr      | tenascin-R                                                                                                      |
| 4 | - | 659156    | ATP5I     | ATP synthase, H <sup>+</sup> transporting, mitochondrial Fo complex, E                                          |
| 4 | + | 39136977  | LIAS      | lipoic acid synthetase                                                                                          |
| 4 | + | 39777109  | N4BP2     | NEDD4 binding protein 2                                                                                         |
| 4 | + | 48528033  | OCIAD1    | OCIA domain containing 1                                                                                        |
| 4 | - | 56198396  | NMU       | neuromedin U                                                                                                    |
| 4 | - | 68093207  | CENPC1    | centromere protein C 1                                                                                          |
| 4 | - | 74154408  | COX18     | COX18 cytochrome c oxidase assembly homolog                                                                     |
| 4 | + | 81326015  | PRDM8     | PR domain containing 8                                                                                          |
| 4 | + | 95347774  | SMARCAD1  | SWI/SNF-related, matrix-associated actin-dependent regulator of chromatin, subfamily a, containing DEAD/H box 1 |
| 4 | + | 109761117 | RPL34     | ribosomal protein L34                                                                                           |
| 4 | + | 120029386 | SYNPO2    | synaptopodin 2                                                                                                  |
| 4 | + | 159812848 | ETFDH     | electron-transferring-flavoprotein dehydrogenase                                                                |
| 5 | - | 137939314 | HSPA9B    | heat shock protein 9 (mortalin)                                                                                 |
| 5 | + | 139997941 | PRO1580   | transmembrane coiled-coil protein 6                                                                             |
| 5 | - | 168129578 | MIRN218-2 | micro-RNA 218-2                                                                                                 |
| 5 | - | 178983359 | HNRPH1    | heterogeneous nuclear protein H1                                                                                |
| 5 | + | 14732096  | FAM105B   | family with sequence similarity 105, member B                                                                   |
| 5 | - | 35265733  | PRLR      | prolactin receptor                                                                                              |
| 5 | + | 43227831  | MGC42105  | serine/threonine-protein kinase NIM1                                                                            |
| 5 | + | 44844683  | MRPS30    | mitochondrial ribosomal protein S30                                                                             |
| 5 | + | 76286090  | CRHBP     | corticotropin releasing hormone binding protein                                                                 |
| 5 | - | 79588899  | SERINC5   | serine incorporator 5                                                                                           |
| 5 | - | 114627054 | PGGT1B    | protein geranylgeranyltransferase type I, beta subunit                                                          |
| 5 | - | 115181025 | CDO1      | cysteine dioxygenase, type I                                                                                    |
| 5 | + | 128329015 | SLC27A6   | solute carrier family 27 (fatty acid transporter), member 6                                                     |
| 5 | + | 137830147 | EGR1      | early growth response 1                                                                                         |
| 5 | - | 140663016 | SLC25A2   | solute carrier family 25 (mitochondrial ornithine transporter), 2                                               |
| 5 | - | 150060876 | RBM22     | RNA binding motif protein 22                                                                                    |
| 5 | - | 157012080 | SOX30     | SRY (sex determining region Y)-box 30                                                                           |
| 6 | + | 17707160  | FAM8A1    | family with sequence similarity 8, member A1                                                                    |
| 6 | - | 26039532  | SLC17A2   | solute carrier family 17 (sodium phosphate), member 2                                                           |
| 6 | + | 26349362  | HIST1H4F  | histone cluster 1, H4f                                                                                          |
| 6 | + | 26705135  | ABT1      | activator of basal transcription 1                                                                              |
| 6 | - | 30266675  | TRIM10    | tripartite motif-containing 10                                                                                  |
| 6 | + | 30693502  | MRPS18B   | mitochondrial ribosomal protein S18B                                                                            |
| 6 | + | 35335071  | ZNF76     | zinc finger protein 76 (expressed in testis)                                                                    |
| 6 | + | 36104109  | MAPK14    | mitogen-activated protein kinase 14                                                                             |
| 6 | + | 36517341  | KCTD20    | potassium channel tetramerisation domain containing 20                                                          |
| 6 | - | 52736832  | GSTA2     | glutathione S-transferase alpha 2                                                                               |
| 6 | - | 52819449  | GSTA5     | glutathione S-transferase alpha 5                                                                               |
| 6 | - | 53122375  | GCM1      | glial cells missing homolog 1 (Drosophila)                                                                      |
| 6 | + | 64339422  | PTP4A1    | protein tyrosine phosphatase type IVA, member 1                                                                 |
| 6 | - | 82520909  | FAM46A    | family with sequence similarity 46, member A                                                                    |
| 6 | + | 83128302  | TPBG      | trophoblast glycoprotein                                                                                        |
| 6 | - | 90119343  | UBE2J1    | ubiquitin-conjugating enzyme E2, J1 (UBC6 homolog, yeast)                                                       |

|   |   |           |          |                                                                                              |
|---|---|-----------|----------|----------------------------------------------------------------------------------------------|
| 6 | - | 106880541 | ATG5     | ATG5 autophagy related 5 homolog ( <i>S. cerevisiae</i> )                                    |
| 6 | - | 149908936 | PPIL4    | peptidylprolyl isomerase (cyclophilin)-like 4                                                |
| 6 | + | 150326679 | ULBP1    | UL16 binding protein 1                                                                       |
| 6 | + | 168163141 | KIF25    | kinesin family member 25                                                                     |
| 6 | - | 168464220 | DACT2    | dapper, antagonist of beta-catenin, homolog 2 ( <i>Xenopus laevis</i> )                      |
| 7 | - | 157586326 | PTPRN2   | protein tyrosine phosphatase, receptor type, N polypeptide 2                                 |
| 7 | - | 5503396   | MIRN589  | micro-RNA 589                                                                                |
| 7 | - | 6359567   | PSCD3    | plekstrin-homology, Sec7 coiled-coil domain 3                                                |
| 7 | - | 104877609 | ATXN7L4  | ataxin-like 4                                                                                |
| 7 | - | 126485401 | MIRN592  | micro-RNA 592                                                                                |
| 7 | + | 154699128 | PRR8     | RNA binding motif protein 33                                                                 |
| 7 | - | 981350    | COX19    | COX19 cytochrome c oxidase assembly homolog                                                  |
| 7 | - | 6831980   | C7orf28B | chromosome 7 open reading frame 28B                                                          |
| 7 | - | 8268756   | ICA1     | islet cell autoantigen 1, 69kDa                                                              |
| 7 | - | 19715197  | TWISTNB  | TWIST neighbor                                                                               |
| 7 | + | 27746264  | TAX1BP1  | Tax1 (human T-cell leukemia virus type I) binding protein 1                                  |
| 7 | + | 30036144  | PLEKHA8  | pleckstrin homology domain containing, family A (phosphoinositide binding specific) member 8 |
| 7 | - | 44662579  | TMED4    | transmembrane emp24 protein transport domain containing 4                                    |
| 7 | - | 65797867  | SBDS     | Shwachman-Bodian-Diamond syndrome                                                            |
| 7 | + | 68404806  | AUTS2    | autism susceptibility candidate 2                                                            |
| 7 | + | 75347358  | RHBDD2   | rhomboid domain containing 2                                                                 |
| 7 | + | 86619431  | DMTF1    | cyclin D binding myb-like transcription factor 1                                             |
| 7 | - | 91603694  | CYP51A1  | cytochrome P450, family 51, subfamily A, polypeptide 1                                       |
| 7 | + | 94731996  | DYNC1I1  | dynein, cytoplasmic 1, intermediate chain 1                                                  |
| 7 | + | 97199133  | TAC1     | tachykinin, precursor 1                                                                      |
| 7 | + | 98844446  | BUD31    | BUD31 homolog ( <i>S. cerevisiae</i> )                                                       |
| 7 | + | 98875964  | CPSF4    | cleavage and polyadenylation specific factor 4, 30kDa                                        |
| 7 | + | 129510778 | MEST     | mesoderm specific transcript homolog (mouse)                                                 |
| 7 | + | 138164860 | TTC26    | tetratricopeptide repeat domain 26                                                           |
| 7 | - | 138445055 | ZC3HAV1  | zinc finger CCCH-type, antiviral 1                                                           |
| 7 | + | 141083813 | SSBP1    | single-stranded DNA binding protein 1                                                        |
| 7 | + | 147733353 | CUL1     | cullin 1                                                                                     |
| 7 | - | 157586326 | PTPRN2   | protein tyrosine phosphatase, receptor type, N polypeptide 2                                 |
| 8 | + | 8598475   | CLDN23   | claudin 23                                                                                   |
| 8 | + | 12854729  | C8orf79  | chromosome 8 open reading frame 79                                                           |
| 8 | + | 17148351  | VPS37A   | vacuolar protein sorting 37 homolog A ( <i>S. cerevisiae</i> )                               |
| 8 | + | 27689753  | ESCO2    | establishment of cohesion 1 homolog 2 ( <i>S. cerevisiae</i> )                               |
| 8 | + | 30135185  | DCTN6    | dynactin 6                                                                                   |
| 8 | + | 38973582  | ADAM9    | ADAM metallopeptidase domain 9                                                               |
| 8 | + | 86206615  | LRRCC1   | leucine rich repeat and coiled-coil domain containing 1                                      |
| 8 | - | 101805444 | PABPC1   | poly(A) binding protein, cytoplasmic 1                                                       |
| 8 | + | 126173266 | NSMCE2   | non-SMC element 2, MMS21 homolog ( <i>S. cerevisiae</i> )                                    |
| 9 | + | 263151    | DOCK8    | dedicator of cytokinesis 8                                                                   |
| 9 | + | 5221356   | INSL4    | insulin-like 4 (placenta)                                                                    |
| 9 | + | 15541266  | C9orf93  | chromosome 9 open reading frame 93                                                           |
| 9 | - | 25669751  | TUSC1    | tumor suppressor candidate 1                                                                 |
| 9 | + | 45622759  | FAM27E2  | family with sequence similarity 27, member E2                                                |

|    |   |           |          |                                                                    |
|----|---|-----------|----------|--------------------------------------------------------------------|
| 9  | - | 71565415  | PTAR1    | protein prenyltransferase alpha subunit repeat containing 1        |
| 9  | - | 139047180 | FUT7     | fucosyltransferase 7 (alpha (1,3) fucosyltransferase)              |
| 10 | + | 35933453  | CX40.1   | gap junction protein delta 4                                       |
| 10 | - | 134911657 | MIRN202  | micro-RNA 202                                                      |
| 10 | + | 14920068  | HSPA14   | heat shock 70kDa protein 14                                        |
| 10 | + | 64562347  | NRBF2    | nuclear receptor binding factor 2                                  |
| 10 | + | 70152941  | CCAR1    | cell division cycle and apoptosis regulator 1                      |
| 10 | - | 73786104  | DNAJB12  | DnaJ (Hsp40) homolog, subfamily B, member 12                       |
| 10 | + | 81880315  | PLAC9    | placenta-specific 9                                                |
| 10 | + | 85889233  | GHITM    | growth hormone inducible transmembrane protein                     |
| 10 | + | 88507295  | BMPR1A   | bone morphogenetic protein receptor, type IA                       |
| 10 | + | 94341152  | KIF11    | kinesin family member 11                                           |
| 10 | + | 94440802  | HHEX     | hematopoietically expressed homeobox                               |
| 10 | + | 99195122  | ZDHHC16  | zinc finger, DHHC-type containing 16                               |
| 10 | + | 101282637 | NKX2-3   | NK2 transcription factor related, locus 3 (Drosophila)             |
| 10 | - | 113933520 | GPAM     | glycerol-3-phosphate acyltransferase, mitochondrial                |
| 10 | + | 118369664 | PNLIPRP2 | pancreatic lipase-related protein 2                                |
| 11 | + | 73265812  | WDR71    | proteasome ATP-ase associated factor                               |
| 11 | - | 1587097   | KRTAP5-8 | keratin associated protein 5-8                                     |
| 11 | - | 2138948   | INS      | insulin                                                            |
| 11 | + | 4072079   | RRM1     | ribonucleotide reductase M1                                        |
| 11 | + | 5666461   | TRIM22   | tripartite motif-containing 22                                     |
| 11 | + | 8017193   | TUB      | tubby homolog (mouse)                                              |
| 11 | - | 10519352  | RNF141   | ring finger protein 141                                            |
| 11 | - | 14950575  | CALCA    | calcitonin-related polypeptide alpha                               |
| 11 | + | 15051583  | CALCB    | calcitonin-related polypeptide beta                                |
| 11 | + | 18245880  | SAA1     | serum amyloid A1                                                   |
| 11 | + | 20577673  | SLC6A5   | solute carrier family 6 (neurotransmitter transporter, glycine), 5 |
| 11 | + | 47246010  | MADD     | MAP-kinase activating death domain                                 |
| 11 | - | 57055721  | TIMM10   | translocase of inner mitochondrial membrane 10 homolog             |
| 11 | + | 59028804  | OR4D11   | olfactory receptor, family 4, subfamily D, member 11               |
| 11 | + | 63498591  | COX8A    | cytochrome c oxidase subunit VIIIA (ubiquitous)                    |
| 11 | + | 63842705  | PRDX5    | peroxiredoxin 5                                                    |
| 11 | - | 64641939  | ZNHIT2   | zinc finger, HIT-type containing 2                                 |
| 11 | - | 64657853  | SYVN1    | synovial apoptosis inhibitor 1, synoviolin                         |
| 11 | + | 65023597  | MALAT1   | metastasis associated lung adenocarcinoma transcript 1             |
| 11 | - | 65842530  | CD248    | CD248 molecule, endosialin                                         |
| 11 | + | 66952479  | RPS6KB2  | ribosomal protein S6 kinase, 70kDa, polypeptide 2                  |
| 11 | + | 67533527  | ALDH3B1  | aldehyde dehydrogenase 3 family, member B1                         |
| 11 | - | 71823360  | CLPB     | ClpB caseinolytic peptidase B homolog (E. coli)                    |
| 11 | - | 82462123  | RAB30    | RAB30, member RAS oncogene family                                  |
| 11 | + | 95163646  | CEP57    | centrosomal protein 57kDa                                          |
| 11 | - | 102468144 | DCUN1D5  | DCN1, defective in cullin neddylation 1, domain containing 5       |
| 11 | + | 117948130 | ARCN1    | archain 1                                                          |
| 11 | - | 122572400 | ASAM     | adipocyte-specific adhesion molecule                               |
| 11 | + | 125678754 | DCPS     | decapping enzyme, scavenger                                        |
| 12 | - | 120504690 | FBXL10   | F box leucine zipper repeat 10                                     |
| 12 | - | 191926    | SLC6A12  | solute carrier family 6 (neurotransmitter transporter, GABA), 12   |



|    |   |           |           |                                                                  |
|----|---|-----------|-----------|------------------------------------------------------------------|
| 12 | + | 438632    | B4GALNT3  | beta-1,4-N-acetyl-galactosaminyl transferase 3                   |
| 12 | + | 4253173   | CCND2     | cyclin D2                                                        |
| 12 | + | 6951117   | EMG1      | nucleolar protein homolog ( <i>S. cerevisiae</i> )               |
| 12 | - | 10216112  | OLR1      | oxidized low density lipoprotein (lectin-like) receptor 1        |
| 12 | - | 45506308  | SLC38A4   | solute carrier family 38, member 4                               |
| 12 | - | 46585649  | VDR       | vitamin D (1,25- dihydroxyvitamin D3) receptor                   |
| 12 | + | 46804138  | PFKM      | phosphofructokinase, muscle                                      |
| 12 | - | 47652131  | WNT10B    | wingless-type MMTV integration site family, member 10B           |
| 12 | + | 49186944  | DIP2B     | DIP2 disco-interacting protein 2 homolog B ( <i>Drosophila</i> ) |
| 12 | + | 56424646  | TSPAN31   | tetraspanin 31                                                   |
| 12 | + | 64869184  | IRAK3     | interleukin-1 receptor-associated kinase 3                       |
| 12 | + | 67919591  | CPSF6     | cleavage and polyadenylation specific factor 6, 68kDa            |
| 12 | - | 87499940  | KITLG     | KIT ligand                                                       |
| 12 | - | 91063858  | BTG1      | B-cell translocation gene 1, anti-proliferative                  |
| 12 | - | 119451366 | COQ5      | coenzyme Q5 homolog, methyltransferase ( <i>S. cerevisiae</i> )  |
| 12 | - | 120781528 | HPD       | 4-hydroxyphenylpyruvate dioxygenase                              |
| 12 | + | 121826169 | CCDC62    | coiled-coil domain containing 62                                 |
| 12 | + | 129921311 | RAN       | RAN, member RAS oncogene family                                  |
| 12 | + | 132268133 | ZNF268    | zinc finger protein 268                                          |
| 13 | - | 22841606  | SACS      | spastic ataxia of Charlevoix-Saguenay (sacsin)                   |
| 13 | + | 26723415  | RPL21     | ribosomal protein L21                                            |
| 13 | - | 49597713  | DLEU2     | deleted in lymphocytic leukemia 2 (non-protein coding)           |
| 13 | - | 51601780  | NEK5      | NIMA (never in mitosis gene a)-related kinase 5                  |
| 14 | + | 20223991  | RNASE4    | ribonuclease, RNase A family, 4                                  |
| 14 | - | 22892648  | SLC22A17  | solute carrier family 22, member 17                              |
| 14 | - | 56346976  | OTX2      | orthodenticle homeobox 2                                         |
| 14 | + | 76858215  | GSTZ1     | glutathione transferase zeta 1                                   |
| 14 | - | 89490328  | C14orf143 | chromosome 14 open reading frame 143                             |
| 14 | - | 94856352  | CLMN      | calmin (calponin-like, transmembrane)                            |
| 14 | - | 105712364 | IGHV1-18  | immunoglobulin heavy variable 1-18                               |
| 15 | + | 70668314  | MIRN630   | micro-RNA 630                                                    |
| 15 | + | 73726836  | SH3PX3    | SH3 and PX3 domain containing 3                                  |
| 15 | - | 20585864  | NIPA2     | non imprinted in Prader-Willi/Angelman syndrome 2                |
| 15 | + | 22752518  | SNURF     | SNRPN upstream reading frame                                     |
| 15 | - | 27349344  | NDNL2     | necdin-like 2                                                    |
| 15 | + | 38650218  | RPUSD2    | RNA pseudouridylate synthase domain containing 2                 |
| 15 | + | 38673447  | CASC5     | cancer susceptibility candidate 5                                |
| 15 | + | 39032694  | CHAC1     | ChaC, cation transport regulator homolog 1 ( <i>E. coli</i> )    |
| 15 | + | 42791835  | B2M       | beta-2-microglobulin                                             |
| 15 | + | 48505562  | USP8      | ubiquitin specific peptidase 8                                   |
| 15 | + | 61583851  | USP3      | ubiquitin specific peptidase 3                                   |
| 15 | + | 70553659  | ARIH1     | ariadne homolog, ubiquitin-conjugating enzyme E2 binding 1       |
| 15 | + | 73827715  | LOC391532 | peptidyl-prolyl cis-trans isomerase A-like                       |
| 15 | + | 74415851  | ISL2      | ISL LIM homeobox 2                                               |
| 15 | + | 91245143  | CHD2      | chromodomain helicase DNA binding protein 2                      |
| 16 | + | 1231892   | TPSAB1    | tryptase alpha/beta 1                                            |
| 16 | - | 14631636  | PARN      | poly(A)-specific ribonuclease (deadenylation nuclease)           |
| 16 | + | 18986793  | COQ7      | coenzyme Q7 homolog, ubiquinone (yeast)                          |

|    |   |          |           |                                                                       |
|----|---|----------|-----------|-----------------------------------------------------------------------|
| 16 | + | 45477676 | GPT2      | glutamic pyruvate transaminase (alanine aminotransferase) 2           |
| 16 | + | 66252213 | PARD6A    | par-6 partitioning defective 6 homolog alpha (C. elegans)             |
| 16 | - | 67921683 | PDF       | peptide deformylase (mitochondrial)                                   |
| 16 | - | 74137898 | CHST5     | carbohydrate (N-acetylglucosamine 6-O) sulfotransferase 5             |
| 16 | - | 79811644 | PKD1L2    | polycystic kidney disease 1-like 2                                    |
| 16 | + | 87398686 | CDT1      | chromatin licensing and DNA replication factor 1                      |
| 16 | + | 88156045 | RPL13     | ribosomal protein L13                                                 |
| 17 | + | 2442224  | PAFAH1B1  | platelet-activating factor acetylhydrolase 1b,regulatory subunit1     |
| 17 | - | 4554188  | PELP1     | proline, glutamate and leucine rich protein 1                         |
| 17 | - | 7248382  | C17orf61  | chromosome 17 open reading frame 61                                   |
| 17 | + | 16225083 | UBB       | ubiquitin B                                                           |
| 17 | + | 23875732 | FOXN1     | forkhead box N                                                        |
| 17 | - | 25586935 | SLC6A4    | solute carrier family 6 neurotransmitter transporter, serotonin, 4    |
| 17 | + | 27288880 | SUZ12     | suppressor of zeste 12 homolog (Drosophila)                           |
| 17 | + | 37099137 | EIF1      | eukaryotic translation initiation factor 1                            |
| 17 | - | 39499580 | LSM12     | LSM12 homolog (S. cerevisiae)                                         |
| 17 | - | 44161100 | HOXB13    | homeobox B13                                                          |
| 17 | + | 44263857 | CALCOCO2  | calcium binding and coiled-coil domain 2                              |
| 17 | - | 57361008 | INTS2     | integrator complex subunit 2                                          |
| 17 | - | 59314112 | GH2       | growth hormone 2                                                      |
| 17 | - | 59328759 | CSH1      | chorionic somatomammotropin hormone 1 (placental lactogen)            |
| 17 | - | 59351346 | GH1       | growth hormone 1                                                      |
| 17 | + | 63144333 | NOL11     | nucleolar protein 11                                                  |
| 17 | - | 63965562 | WIPI1     | WD repeat domain, phosphoinositide interacting 1                      |
| 17 | + | 72648363 | SEC14L1   | SEC14-like 1 (S. cerevisiae)                                          |
| 17 | - | 75428287 | CBX4      | chromobox homolog 4                                                   |
| 17 | - | 77412254 | P4HB      | prolyl 4-hydroxylase, beta polypeptide                                |
| 17 | - | 77479282 | MAFG      | v-maf musculoaponeurotic fibrosarcoma oncogene homolog G              |
| 18 | + | 3236409  | MRCL3     | myosin regulatory light chain                                         |
| 18 | + | 147017   | USP14     | ubiquitin specific peptidase 14 tRNA-guanine transglycosylase         |
| 18 | + | 10443430 | APCDD1    | adenomatosis polyposis coli down-regulated 1                          |
| 18 | + | 11840149 | CHMP1B    | chromatin modifying protein 1B                                        |
| 18 | - | 12057986 | LOC646044 | single stranded DNA binding protein 4 pseudogene                      |
| 18 | + | 12936960 | SEH1L     | SEH1-like (S. cerevisiae)                                             |
| 18 | - | 17537831 | ABHD3     | abhydrolase domain containing 3                                       |
| 18 | + | 18767269 | RBBP8     | retinoblastoma binding protein 8                                      |
| 18 | - | 23018593 | CHST9     | carbohydrate (N-acetylgalactosamine 4-O) sulfotransferase 9           |
| 18 | - | 39111497 | SYT4      | synaptotagmin IV                                                      |
| 18 | + | 50049617 | POLI      | polymerase (DNA directed) iota                                        |
| 19 | + | 1220381  | CIRBP     | cold inducible RNA binding protein                                    |
| 19 | + | 1335163  | NDUFS7    | NADH dehydrogenase (ubiquinone) Fe-S protein 7, 20kDa                 |
| 19 | + | 2221860  | OAZ1      | ornithine decarboxylase antizyme 1                                    |
| 19 | - | 2734392  | SGTA      | small glutamine-rich tetratricopeptide repeat TPR-containing $\alpha$ |
| 19 | - | 3509154  | C19orf28  | chromosome 19 open reading frame 28                                   |
| 19 | + | 4354038  | CHAF1A    | chromatin assembly factor 1, subunit A (p150)                         |
| 19 | - | 6688731  | GPR108    | G protein-coupled receptor 108                                        |
| 19 | - | 7914574  | TIMM44    | translocase of inner mitochondrial membrane 44 homolog                |

|    |   |           |           |                                                                          |
|----|---|-----------|-----------|--------------------------------------------------------------------------|
| 19 | - | 12807634  | RTBDN     | retbindin                                                                |
| 19 | - | 14448645  | PTGER1    | prostaglandin E receptor 1 (subtype EP1), 42kDa                          |
| 19 | + | 16468648  | C19orf44  | chromosome 19 open reading frame 44                                      |
| 19 | - | 17660968  | UNC13A    | unc-13 homolog A ( <i>C. elegans</i> )                                   |
| 19 | + | 40321874  | FXYD1     | FXYD domain containing ion transport regulator 1                         |
| 19 | + | 40337949  | FXYD5     | FXYD domain containing ion transport regulator 5                         |
| 19 | + | 46595495  | BCKDHA    | branched chain keto acid dehydrogenase E1, alpha polypeptide             |
| 19 | - | 50373391  | TRAPPC6A  | trafficking protein particle complex 6A                                  |
| 19 | + | 50662833  | FOSB      | FBJ murine osteosarcoma viral oncogene homolog B                         |
| 19 | - | 51082642  | IRF2BP1   | interferon regulatory factor 2 binding protein 1                         |
| 19 | + | 52452101  | CCDC9     | coiled-coil domain containing 9                                          |
| 19 | + | 52532711  | GPR77     | G protein-coupled receptor 77                                            |
| 19 | + | 54682616  | RPL13A    | ribosomal protein L13a                                                   |
| 19 | + | 55071733  | TBC1D17   | TBC1 domain family, member 17                                            |
| 19 | + | 55571526  | NR1H2     | nuclear receptor subfamily 1, group H, member 2                          |
| 19 | - | 56000178  | C19orf48  | chromosome 19 open reading frame 48                                      |
| 19 | - | 63558553  | A1BG      | alpha-1-B glycoprotein                                                   |
| 20 | + | 47986226  | ZNF313    | zinc finger protein 313                                                  |
| 20 | - | 56861104  | SANG      | GMAS anti-sense RNA                                                      |
| 20 | + | 4649580   | PRND      | prion protein 2 (dublet)                                                 |
| 20 | + | 29870345  | MYLK2     | myosin light chain kinase 2                                              |
| 20 | - | 47965707  | SPATA2    | spermatogenesis associated 2                                             |
| 20 | + | 48242385  | CEBPB     | CCAAT/enhancer binding protein (C/EBP), beta                             |
| 20 | + | 51024317  | TSHZ2     | teashirt zinc finger homeobox 2                                          |
| 20 | + | 61394227  | COL20A1   | collagen, type XX, alpha 1                                               |
| 21 | + | 43269339  | PKNOX1    | PBX/knotted 1 homeobox 1                                                 |
| 21 | - | 45551494  | C21orf93  | chromosome 21 open reading frame 93                                      |
| 21 | + | 46567204  | PCNT      | pericentrin                                                              |
| 22 | + | 18399691  | MIRN185   | micro-RNA 185                                                            |
| 22 | + | 17273697  | DGCR6     | DiGeorge syndrome critical region gene 6                                 |
| 22 | + | 20754721  | IGLVIV-65 | immunoglobulin lambda variable (IV)-65 pseudogene                        |
| 22 | + | 23282654  | SNRPD3    | small nuclear ribonucleoprotein D3 polypeptide 18kDa                     |
| 22 | - | 27406974  | TTC28     | tetratricopeptide repeat domain 28                                       |
| 22 | - | 28169672  | RFPL1S    | RFPL1 antisense RNA (non-protein coding)                                 |
| 22 | + | 28807621  | HORMAD2   | HORMA domain containing 2                                                |
| 22 | + | 36287888  | CDC42EP1  | CDC42 effector protein (Rho GTPase binding) 1                            |
| 22 | + | 36333649  | GGA1      | golgi-associated, $\gamma$ adaptin ear containing, ARF binding protein 1 |
| 23 | + | 46961058  | PCTK1     | cdk16 PCTAIRE protein kinase                                             |
| 23 | - | 53271184  | SMCX      | lysine demethylase 5C                                                    |
| 23 | + | 110811055 | GLT28D1   | UDP-N-acetylglucosamine transferase                                      |
| 23 | + | 1349570   | CSF2RA    | colony stimulating factor 2 receptor, $\alpha$ (GM-CSFR $\alpha$ )       |
| 23 | + | 22927832  | DDX53     | DEAD (Asp-Glu-Ala-Asp) box polypeptide 53                                |
| 23 | - | 23954325  | KLHL15    | kelch-like 15 ( <i>Drosophila</i> )                                      |
| 23 | - | 48743147  | GRIPAP1   | GRIP1 associated protein 1                                               |
| 23 | - | 54086351  | PHF8      | PHD finger protein 8                                                     |
| 23 | + | 72699345  | CHIC1     | cysteine-rich hydrophobic domain 1                                       |
| 23 | + | 95825596  | DIAPH2    | diaphanous homolog 2 ( <i>Drosophila</i> )                               |

|    |   |           |         |                                                                    |
|----|---|-----------|---------|--------------------------------------------------------------------|
| 23 | - | 101073824 | ZMAT1   | zinc finger, matrin-type 1                                         |
| 23 | - | 102829992 | MORF4L2 | mortality factor 4 like 2                                          |
| 23 | + | 119621756 | MCTS1   | malignant T cell amplified sequence 1                              |
| 23 | + | 151616064 | MAGEA6  | melanoma antigen family A, 6                                       |
| 24 | + | 1349570   | CSF2RA  | colony stimulating factor 2 receptor, $\alpha$ (GM-CSFR $\alpha$ ) |
| 24 | + | 14679252  | VCY     | variable charge, Y-linked                                          |

**Table S2** – Murine genes harboring TGACGCAA between -2 kb to + 1 kb

| <b>Chromosome</b> | <b>Strand</b> | <b>Position</b> | <b>Gene name</b> | <b>Descriptive name</b>                                   |
|-------------------|---------------|-----------------|------------------|-----------------------------------------------------------|
| 1                 | -             | 13581123        | Tram1            | translocating chain-associating membrane protein 1        |
| 1                 | -             | 31007370        | Ptp4a1           | protein tyrosine phosphatase 4a1                          |
| 1                 | -             | 58504274        | Ppil3            | peptidylprolyl isomerase (cyclophilin)-like 3             |
| 1                 | -             | 59727670        | Sumo1            | SMT3 suppressor of mif two 3 homolog 1 (yeast)            |
| 1                 | -             | 75260897        | Ptpn             | protein tyrosine phosphatase, receptor type, N            |
| 1                 | +             | 89652506        | Atg16l1          | autophagy-related 16-like 1 (yeast)                       |
| 1                 | -             | 90102345        | Dnajb3           | DnaJ (Hsp40) homolog, subfamily B, member 3               |
| 1                 | +             | 93217598        | Espnl            | espin-like                                                |
| 1                 | +             | 94831268        | Capn10           | calpain 10                                                |
| 1                 | +             | 135260016       | Etnk2            | ethanolamine kinase 2                                     |
| 1                 | +             | 152239944       | Tpr              | translocated promoter region                              |
| 1                 | +             | 154801990       | Nmnat2           | nicotinamide nucleotide adenylyltransferase 2             |
| 1                 | +             | 157005699       | Stx6             | syntaxin 6                                                |
| 1                 | +             | 162126017       | Mrps14           | mitochondrial ribosomal protein S14                       |
| 1                 | +             | 172975039       | Trnag-gcc        | transfer RNA glycine (anticodon GCC)                      |
| 1                 | -             | 172988946       | Fcgr3            | Fc receptor, IgG, low affinity III                        |
| 1                 | +             | 174243466       | Igsf8            | immunoglobulin superfamily, member 8                      |
| 1                 | -             | 193221461       | Ppp2r5a          | protein phosphatase 2, regulatory subunit B $\alpha$ form |
| 1                 | -             | 195099239       | G0s2             | G0/G1 switch gene 2                                       |
| 2                 | +             | 3430310         | Armet1           | astrocyte-derived neurotrophic factor                     |
| 2                 | +             | 25127990        | Anapc2           | anaphase promoting complex subunit 2                      |
| 2                 | -             | 25430870        | Phpt1            | phosphohistidine phosphatase 1                            |
| 2                 | +             | 30092968        | Lrrc8a           | leucine rich repeat containing 8A                         |
| 2                 | +             | 31493916        | Prdm12           | PR domain containing 12                                   |
| 2                 | +             | 69485184        | Bbs5             | Bardet-Biedl syndrome 5 (human)                           |
| 2                 | +             | 84887993        | Tnks1bp1         | tankyrase 1 binding protein 1                             |
| 2                 | -             | 88842151        | Olf1215          | olfactory receptor 1215                                   |
| 2                 | -             | 91865599        | Creb3l1          | cAMP responsive element binding protein 3-like 1          |
| 2                 | -             | 118375435       | Bmf              | BCL2 modifying factor                                     |
| 2                 | +             | 118872623       | Casc5            | cancer susceptibility candidate 5                         |
| 2                 | +             | 119176732       | Chac1            | ChaC, cation transport regulator-like 1 (E. coli)         |
| 2                 | -             | 122202893       | Trnah-gug        | transfer RNA histidine(anticodon GUG)                     |
| 2                 | +             | 128954057       | Chchd5           | coiled-coil-helix-coiled-coil-helix domain                |
| 2                 | +             | 129024441       | Slc20a1          | solute carrier family 20, member 1                        |
| 2                 | -             | 130410102       | Avp              | arginine vasopressin                                      |
| 2                 | +             | 136327800       | BC034902         | cDNA sequence BC034902                                    |
| 2                 | +             | 142902995       | Otor             | otoraplin                                                 |
| 2                 | +             | 150574797       | Entpd6           | ectonucleoside triphosphate diphosphohydrolase 6          |
| 2                 | +             | 153115986       | Kif3b            | kinesin family member 3B                                  |
| 2                 | -             | 174122772       | Nespas           | neuroendocrine secretory protein antisense                |
| 3                 | -             | 129534318       | Nola1            | nucleolar protein family A, member 1                      |
| 3                 | +             | 28790431        | Gm1527           | predicted gene 1527                                       |
| 3                 | +             | 35964895        | Acad9            | acyl-Coenzyme A dehydrogenase family, member 9            |

|   |   |           |            |                                                       |
|---|---|-----------|------------|-------------------------------------------------------|
| 3 | - | 58496032  | Siah2      | seven in absentia 2                                   |
| 3 | - | 58934599  | P2ry14     | purinergic receptor P2Y, G-protein coupled, 14        |
| 3 | + | 59886165  | Sucnr1     | succinate receptor 1                                  |
| 3 | + | 83039206  | Dchs2      | dachsous 2 (Drosophila)                               |
| 3 | - | 87864218  | Apoa1bp    | apolipoprotein A-I binding protein                    |
| 3 | - | 94945940  | Tnfaip8l2  | tumor necrosis factor, alpha-induced protein 8-like 2 |
| 3 | + | 96256784  | Trnah-gug  | transfer RNA histidine(anticodon GUG)                 |
| 3 | - | 96261699  | Trnah-gug  | transfer RNA histidine(anticodon GUG)                 |
| 3 | - | 110054982 | Prmt6      | protein arginine N-methyltransferase 6                |
| 3 | - | 122939124 | Synpo2     | synaptopodin 2                                        |
| 4 | + | 138936523 | Zubr1      | ubiquitin protein ligase 3 component                  |
| 4 | + | 15809315  | Calb1      | calbindin 1                                           |
| 4 | + | 32744113  | Mdn1       | midasin homolog (yeast)                               |
| 4 | - | 35792052  | Lingo2     | leucine rich repeat and Ig domain containing 2        |
| 4 | + | 43970949  | Glipr2     | GLI pathogenesis-related 2                            |
| 4 | + | 62021653  | Slc31a1    | solute carrier family 31, member 1                    |
| 4 | - | 88368719  | Klh19      | kelch-like 9 (Drosophila)                             |
| 4 | + | 101390661 | Lepr       | leptin receptor                                       |
| 4 | - | 125880047 | Thrap3     | thyroid hormone receptor associated protein 3         |
| 4 | + | 126354897 | Psmb2      | proteasome (prosome, macropain) subunit, beta type 2  |
| 4 | - | 127005587 | Gjb3       | gap junction protein, beta 3                          |
| 4 | + | 139464530 | Gm1667     | predicted gene 1667                                   |
| 4 | - | 147413235 | Clcn6      | chloride channel 6                                    |
| 4 | + | 151851822 | Nphp4      | nephronophthisis 4 (juvenile) homolog (human)         |
| 5 | + | 75471978  | Gsh2       | GS homeobox domain protein                            |
| 5 | - | 139845477 | Mirn339    | micro-RNA 339                                         |
| 5 | - | 24348516  | Rheb       | Ras homolog enriched in brain                         |
| 5 | + | 31411281  | Dnajc5g    | DnaJ (Hsp40) homolog, subfamily C, member 5 gamma     |
| 5 | - | 31595153  | Ift172     | intraflagellar transport 172 homolog (Chlamydomonas)  |
| 5 | + | 35925604  | Acox3      | acyl-Coenzyme A oxidase 3, pristanoyl                 |
| 5 | - | 65483400  | Tmem156    | transmembrane protein 156                             |
| 5 | - | 73128892  | Txk        | TXK tyrosine kinase                                   |
| 5 | + | 98610539  | Prdm8      | PR domain containing 8                                |
| 5 | + | 104182457 | Aff1       | AF4/FMR2 family, member 1                             |
| 5 | - | 111211505 | Pus1       | pseudouridine synthase 1                              |
| 5 | + | 111759697 | Pitpnb     | phosphatidylinositol transfer protein, beta           |
| 5 | + | 112705517 | Tpst2      | protein-tyrosine sulfotransferase 2                   |
| 5 | + | 115729678 | Coq5       | coenzyme Q5 homolog, methyltransferase (yeast)        |
| 5 | + | 124562049 | Ogfod2     | 2-oxoglutarate and iron-dependent oxygenase domain 2  |
| 5 | + | 129525578 | Ran        | RAN, member RAS oncogene family                       |
| 5 | + | 135844351 | Nsun5      | NOL1/NOP2/Sun domain family, member 5                 |
| 5 | + | 145901199 | Bud31      | BUD31 homolog (yeast)                                 |
| 5 | - | 147397795 | Gpr12      | G-protein coupled receptor 12                         |
| 5 | - | 148707344 | Slc46a3    | solute carrier family 46, member 3                    |
| 6 | - | 27886679  | Mirn592    | micro-RNA 592                                         |
| 6 | - | 30120397  | Mirn96     | micro-RNA 96                                          |
| 6 | + | 7504865   | Tac1       | tachykinin 1                                          |
| 6 | + | 42751442  | Olf451-ps1 | olfactory receptor 451, pseudogene 1                  |

|   |   |           |             |                                                                                                                 |
|---|---|-----------|-------------|-----------------------------------------------------------------------------------------------------------------|
| 6 | - | 52108902  | Hoxa1       | homeobox A1                                                                                                     |
| 6 | + | 64992597  | Smarcad1    | SWI/SNF-related, matrix-associated actin-dependent regulator of chromatin, subfamily a, containing DEAD/H box 1 |
| 6 | + | 70621498  | Igk-V21-4   | immunoglobulin kappa chain variable 21 (V21)-4                                                                  |
| 6 | + | 83691121  | Atp6v1b1    | ATPase, H <sup>+</sup> transporting, lysosomal V1 subunit B1                                                    |
| 6 | - | 87995309  | Rab7        | RAB7, member RAS oncogene family                                                                                |
| 6 | + | 100781916 | Ppp4r2      | protein phosphatase 4, regulatory subunit 2                                                                     |
| 6 | - | 127101072 | Ccnd2       | cyclin D2                                                                                                       |
| 6 | - | 128477300 | Pzp         | pregnancy zone protein                                                                                          |
| 6 | - | 129610681 | Klrc2       | killer cell lectin-like receptor subfamily C, member 2                                                          |
| 6 | + | 136901472 | Pde6h       | phosphodiesterase 6H, cGMP-specific, cone, gamma                                                                |
| 6 | - | 142520221 | Kcnj8       | potassium inwardly-rectifying channel, subfamily J, member 8                                                    |
| 7 | + | 5031711   | Epn1        | epsin 1                                                                                                         |
| 7 | - | 6443287   | Olf1347     | olfactory receptor 1347                                                                                         |
| 7 | - | 19895451  | Fosb        | FBJ osteosarcoma oncogene B                                                                                     |
| 7 | - | 20268062  | Apoc4       | apolipoprotein C-IV                                                                                             |
| 7 | - | 20301515  | Tomm40      | translocase of outer mitochondrial membrane 40 homolog                                                          |
| 7 | + | 30645009  | Zfp420      | zinc finger protein 420                                                                                         |
| 7 | + | 31348340  | U2af114     | U2 small nuclear RNA auxiliary factor 1-like 4                                                                  |
| 7 | + | 52105311  | Akt1s1      | AKT1 substrate 1 (proline-rich)                                                                                 |
| 7 | + | 52973418  | Rpl18       | ribosomal protein L18                                                                                           |
| 7 | + | 57165639  | Slc6a5      | solute carrier family 6 (neurotransmitter transporter, glycine), 5                                              |
| 7 | + | 74792764  | Ttc23       | tetratricopeptide repeat domain 23                                                                              |
| 7 | - | 80686043  | Chd2        | chromodomain helicase DNA binding protein 2                                                                     |
| 7 | - | 115987156 | Olf1515-ps1 | olfactory receptor 515, pseudogene 1                                                                            |
| 7 | - | 121779933 | Calca       | calcitonin/calcitonin-related polypeptide, alpha                                                                |
| 7 | - | 126864313 | Thumpd1     | THUMP domain containing 1                                                                                       |
| 7 | + | 134005961 | Hirip3      | HIRA interacting protein 3                                                                                      |
| 7 | - | 134339632 | Cd2bp2      | CD2 antigen (cytoplasmic tail) binding protein 2                                                                |
| 7 | + | 144086088 | Mgmt        | O-6-methylguanine-DNA methyltransferase                                                                         |
| 7 | + | 148066457 | Psm13       | proteasome (prosome, macropain) 26S subunit, non-ATPase, 13                                                     |
| 7 | - | 152471315 | Tpcn2       | two pore segment channel 2                                                                                      |
| 8 | - | 3947513   | Cd209c      | CD209c antigen                                                                                                  |
| 8 | + | 4612626   | BC003267    | cDNA sequence BC003267                                                                                          |
| 8 | - | 9771853   | Tmem28      | transmembrane protein 28                                                                                        |
| 8 | - | 46394087  | Klkb1       | kallikrein B, plasma 1                                                                                          |
| 8 | - | 75016601  | Slc35e1     | solute carrier family 35, member E1                                                                             |
| 8 | - | 85856722  | Elmod2      | ELMO domain containing 2                                                                                        |
| 8 | + | 96561014  | Ogfod1      | 2-oxoglutarate and iron-dependent oxygenase domain 1                                                            |
| 8 | + | 96910203  | Herpud1     | homocysteine-inducible, ER stress-inducible, ubiquitin-like domain member 1                                     |
| 8 | + | 107871021 | Slc9a5      | solute carrier family 9 (sodium/hydrogen exchanger), member 5                                                   |
| 8 | + | 119680694 | Gan         | giant axonal neuropathy                                                                                         |
| 9 | + | 37336304  | Esam1       | endothelial cell adhesion molecule 1                                                                            |
| 9 | - | 67086345  | Mir190      | micro-RNA 190                                                                                                   |
| 9 | - | 56776269  | Sh3px3      | SH3 and PX domain containing 3                                                                                  |
| 9 | - | 122203265 | Tmem16k     | trans-membrane protein 16K                                                                                      |
| 9 | + | 21171983  | Ilf3        | interleukin enhancer binding factor 3                                                                           |

|    |   |           |            |                                                                                             |
|----|---|-----------|------------|---------------------------------------------------------------------------------------------|
| 9  | - | 36534215  | Chek1      | checkpoint kinase 1 homolog ( <i>S. pombe</i> )                                             |
| 9  | - | 37155189  | Ccdc15     | coiled-coil domain containing 15                                                            |
| 9  | + | 37876183  | Olf886-ps1 | olfactory receptor 886, pseudogene 1                                                        |
| 9  | + | 38137081  | Olf25      | olfactory receptor 25                                                                       |
| 9  | + | 43875009  | Usp2       | ubiquitin specific peptidase 2                                                              |
| 9  | - | 45078789  | Il10ra     | interleukin 10 receptor, alpha                                                              |
| 9  | - | 45793499  | Pafah1b2   | platelet-activating factor acetylhydrolase, isoform 1b, subunit 2                           |
| 9  | + | 48909731  | Tmprss5    | transmembrane protease, serine 5 (spinesin)                                                 |
| 9  | + | 57351432  | Rpp25      | ribonuclease P 25 subunit (human)                                                           |
| 9  | - | 61795768  | Kif23      | kinesin family member 23                                                                    |
| 9  | - | 62659887  | Fem1b      | feminization 1 homolog b ( <i>C. elegans</i> )                                              |
| 9  | - | 66440805  | Usp3       | ubiquitin specific peptidase 3                                                              |
| 9  | + | 69838191  | Bnip2      | BCL2/adenovirus E1B interacting protein 2                                                   |
| 9  | + | 98855646  | Foxl2      | forkhead box L2                                                                             |
| 9  | - | 106101770 | Ppm1m      | protein phosphatase 1M                                                                      |
| 9  | - | 107240401 | Hemk1      | HemK methyltransferase family member 1                                                      |
| 9  | - | 108481418 | Wdr6       | WD repeat domain 6                                                                          |
| 9  | + | 121619472 | Deb1       | differentially expressed in B16F10 1                                                        |
| 10 | - | 127190008 | Admr       | G-protein coupled receptor 182                                                              |
| 10 | - | 19571890  | Slc35d3    | solute carrier family 35, member D3                                                         |
| 10 | + | 22363559  | Slc2a12    | solute carrier family 2 (facilitated glucose transporter), 12                               |
| 10 | + | 23756699  | Taar7e     | trace amine-associated receptor 7E                                                          |
| 10 | + | 23869829  | Stx7       | syntaxin 7                                                                                  |
| 10 | + | 51743467  | Vgl2       | vestigial like 2 homolog ( <i>Drosophila</i> )                                              |
| 10 | - | 57254172  | Serinc1    | serine incorporator 1                                                                       |
| 10 | + | 80289185  | Oaz1       | ornithine decarboxylase antizyme 1                                                          |
| 10 | + | 84218247  | Rfx4       | regulatory factor X, 4 (influences HLA class II expression)                                 |
| 10 | + | 87843045  | Gnptab     | N-acetylglucosamine-1-phosphate transferase                                                 |
| 10 | - | 126508114 | Tspan31    | tetraspanin 31                                                                              |
| 10 | + | 126728649 | Ddit3      | DNA-damage inducible transcript 3                                                           |
| 10 | - | 128360603 | Bloc1s1    | biogenesis of lysosome-related organelles complex-1, subunit 1                              |
| 11 | + | 50191184  | Hnrph1     | heterogeneous nuclear riboprotein H1                                                        |
| 11 | + | 105927258 | Ccdc44     | translational activator of mitochondrial cytochrome c oxidase 1                             |
| 11 | + | 5421663   | Xbp1       | X-box binding protein 1                                                                     |
| 11 | - | 6130390   | Npc1l1     | NPC1-like 1                                                                                 |
| 11 | - | 48672021  | Trnal-aag  | transfer RNA leucine (anticodon AAG)                                                        |
| 11 | + | 59761726  | Med9       | mediator of RNA pol II transcription, subunit 9 homolog                                     |
| 11 | - | 70223551  | Pelp1      | proline, glutamic acid and leucine rich protein 1                                           |
| 11 | + | 76812003  | Slc6a4     | solute carrier family 6(neurotransmitter transporter, serotonin) 4                          |
| 11 | - | 95171573  | Myst2      | MYST histone acetyltransferase 2                                                            |
| 11 | - | 95937301  | Atp5g1     | ATP synthase, H <sup>+</sup> transporting, mitochondrial F0 complex, subunit c1 (subunit 9) |
| 11 | + | 96055607  | Hoxb13     | homeobox B13                                                                                |
| 11 | - | 97632883  | Trnac-gca  | transfer RNA cysteine (anticodon GCA)                                                       |
| 11 | - | 97849650  | Plxdc1     | plexin domain containing 1                                                                  |
| 11 | - | 98448749  | Ormdl3     | ORM1-like 3 ( <i>S. cerevisiae</i> )                                                        |
| 11 | - | 101032753 | Plekhh3    | pleckstrin homology domain containing, family H, member 3                                   |
| 11 | - | 101163623 | Becn1      | beclin 1, autophagy related                                                                 |



|    |   |           |           |                                                                                       |
|----|---|-----------|-----------|---------------------------------------------------------------------------------------|
| 11 | + | 101177526 | Psme3     | proteasome (prosome, macropain) 28 subunit, 3                                         |
| 11 | + | 102975990 | Hexim1    | hexamethylene bis-acetamide inducible 1                                               |
| 11 | + | 104091240 | Mapt      | microtubule-associated protein tau                                                    |
| 11 | - | 114821292 | Cd300c    | CD300C antigen                                                                        |
| 11 | - | 115138610 | Fdxr      | ferredoxin reductase                                                                  |
| 11 | - | 115159544 | Fads6     | fatty acid desaturase domain family, member 6                                         |
| 11 | - | 115874603 | Galk1     | galactokinase 1                                                                       |
| 11 | - | 115949703 | Wbp2      | WW domain binding protein 2                                                           |
| 11 | - | 118151660 | Usp36     | ubiquitin specific peptidase 36                                                       |
| 12 | - | 16765513  | Greb1     | gene regulated by estrogen in breast cancer protein                                   |
| 12 | + | 25265786  | Grhl1     | grainyhead-like 1 (Drosophila)                                                        |
| 12 | - | 32746804  | Prkar2b   | protein kinase, cAMP dependent regulatory, type II beta                               |
| 12 | + | 34114483  | Twistnb   | TWIST neighbor                                                                        |
| 12 | - | 45311193  | Dnajb9    | DnaJ (Hsp40) homolog, subfamily B, member 9                                           |
| 12 | + | 45370124  | Pnpla8    | patatin-like phospholipase domain containing 8                                        |
| 12 | + | 80398606  | Rad51l1   | RAD51-like 1 ( <i>S. cerevisiae</i> )                                                 |
| 12 | - | 104895549 | Serpina6  | serine (or cysteine) peptidase inhibitor, clade A, member 6                           |
| 12 | - | 106103556 | Clmn      | calmin                                                                                |
| 12 | - | 112217337 | Ankrd9    | ankyrin repeat domain 9                                                               |
| 12 | - | 120205547 | Abcb5     | ATP-binding cassette, sub-family B (MDR/TAP), member 5                                |
| 13 | + | 47216964  | Ibrdc2    | E3 ubiquitin ligase ring finger protein 144B                                          |
| 13 | + | 64533487  | Ccrk      | cdk 20                                                                                |
| 13 | - | 21843839  | Hist1h4k  | histone cluster 1, H4k                                                                |
| 13 | + | 23662983  | Hist1h2bg | histone cluster 1, H2bg                                                               |
| 13 | - | 27674730  | Prl8a1    | prolactin family 8, subfamily a, member 1                                             |
| 13 | - | 46823388  | Nup153    | nucleoporin 153                                                                       |
| 13 | - | 49404682  | Fgd3      | FYVE, RhoGEF and PH domain containing 3                                               |
| 13 | + | 49436797  | Bicd2     | bicaudal D homolog 2 (Drosophila)                                                     |
| 13 | - | 53472788  | Sptlc1    | serine palmitoyltransferase, long chain base subunit 1                                |
| 13 | - | 55122082  | Hk3       | hexokinase 3                                                                          |
| 13 | - | 65215717  | Hiatl1    | hippocampus abundant transcript-like 1                                                |
| 13 | + | 74100236  | Zdhhc11   | zinc finger, DHHC domain containing 11                                                |
| 13 | - | 96025354  | Pde8b     | phosphodiesterase 8B                                                                  |
| 14 | + | 8650243   | Flnb      | filamin, beta                                                                         |
| 14 | - | 9211975   | Oit1      | oncoprotein induced transcript 1                                                      |
| 14 | - | 22569688  | Dusp13    | dual specificity phosphatase 13                                                       |
| 14 | - | 46008714  | Gnpnat1   | glucosamine-phosphate N-acetyltransferase 1                                           |
| 14 | - | 47809174  | Gch1      | GTP cyclohydrolase 1                                                                  |
| 14 | + | 56660204  | Mcpt2     | mast cell protease 2                                                                  |
| 14 | + | 66914773  | Trim35    | tripartite motif-containing 35                                                        |
| 14 | - | 69199130  | Adamdec1  | ADAM-like, decysin 1                                                                  |
| 14 | + | 70008517  | Loxl2     | lysyl oxidase-like 2                                                                  |
| 14 | - | 70921845  | Bmp1      | bone morphogenetic protein 1                                                          |
| 14 | + | 73540979  | Rcbtb2    | regulator of chromosome condensation (RCC1) and BTB (POZ) domain containing protein 2 |
| 14 | - | 87541094  | Diap3     | diaphanous homolog 3 (Drosophila)                                                     |
| 15 | + | 76541046  | Lrrc14    | leucine rich repeat containing 14                                                     |
| 15 | + | 81846815  | Xrcc6     | X-ray repair complementing defective repair in hamster cells 6                        |

|    |   |          |           |                                                                   |
|----|---|----------|-----------|-------------------------------------------------------------------|
| 15 | + | 85037285 | Fbln1     | fibulin 1                                                         |
| 15 | - | 90510793 | Cpne8     | copine VIII                                                       |
| 16 | - | 90285644 | Sfrs15    | serine/arginine-rich splicing factor 15                           |
| 16 | + | 96582094 | Jam4      | tight junction adhesion Ig superfamily member                     |
| 16 | - | 4560378  | Tcfap4    | transcription factor AP4                                          |
| 16 | + | 13819112 | Ntan1     | N-terminal Asn amidase                                            |
| 16 | + | 17406880 | Snap29    | synaptosomal-associated protein 29                                |
| 16 | + | 20140914 | Yeats2    | YEATS domain containing 2                                         |
| 16 | + | 57120478 | Tomm70a   | translocase of outer mitochondrial membrane 70 homolog A          |
| 16 | + | 93711461 | Dopey2    | dopey family member 2                                             |
| 17 | + | 73457311 | Lycat     | lysocardiolipin acetyltransferase 1                               |
| 17 | + | 7184026  | Rnaset2b  | ribonuclease T2B                                                  |
| 17 | + | 7375317  | Rps6ka2   | ribosomal protein S6 kinase, polypeptide 2                        |
| 17 | - | 15665772 | Pdcd2     | programmed cell death 2                                           |
| 17 | + | 26011992 | Trnag-ccc | transfer RNA glycine (anticodon CCC)                              |
| 17 | + | 26250835 | Tmem8     | transmembrane protein 8 (five membrane-spanning domains)          |
| 17 | + | 27053834 | Kifc1     | kinesin family member C1                                          |
| 17 | - | 33531699 | Zfp101    | zinc finger protein 101                                           |
| 17 | + | 35689562 | Cdsn      | corneodesmosin                                                    |
| 17 | - | 36463885 | H2-M10.1  | histocompatibility 2, M region locus 10.1                         |
| 17 | + | 46390861 | Gm88      | predicted gene 88                                                 |
| 17 | + | 46818013 | Mea1      | male enhanced antigen 1                                           |
| 17 | + | 53618333 | Rab5a     | RAB5A, member RAS oncogene family                                 |
| 17 | - | 54437913 | Slc5a7    | solute carrier family 5 (choline transporter), member 7           |
| 17 | + | 56179749 | Chaf1a    | chromatin assembly factor 1, subunit A (p150)                     |
| 17 | - | 66233635 | Ralbp1    | ralA binding protein 1                                            |
| 17 | - | 68353044 | Arhgap28  | Rho GTPase activating protein 28                                  |
| 17 | - | 85191338 | Lrpprc    | leucine-rich PPR-motif containing                                 |
| 17 | + | 87362220 | Rhoq      | ras homolog gene family, member Q                                 |
| 18 | - | 31607060 | Syt4      | synaptotagmin IV                                                  |
| 18 | + | 35019360 | Egr1      | early growth response 1                                           |
| 18 | + | 36894677 | Tmco6     | transmembrane and coiled-coil domains 6                           |
| 18 | + | 52776278 | Zfp474    | zinc finger protein 474                                           |
| 18 | - | 67021244 | Mc4r      | melanocortin 4 receptor                                           |
| 19 | - | 3912668  | Ndufs8    | NADH dehydrogenase (ubiquinone) Fe-S protein 8                    |
| 19 | - | 4163359  | Rps6kb2   | ribosomal protein S6 kinase, polypeptide 2                        |
| 19 | - | 4192623  | Tbc1d10c  | TBC1 domain family, member 10c                                    |
| 19 | + | 6058738  | Fau       | (FBR-MuSV) ubiquitously expressed (fox derived)                   |
| 19 | - | 8787513  | Slc3a2    | solute carrier family 3 dibasic and neutral aminoacid transport 2 |
| 19 | + | 37758611 | Cyp26c1   | cytochrome P450, family 26, subfamily c, polypeptide 1            |
| 19 | - | 40346429 | Pdlim1    | PDZ and LIM domain 1 (elfin)                                      |
| 19 | - | 40662896 | Aldh18a1  | aldehyde dehydrogenase 18 family, member A1                       |
| 19 | - | 43750560 | Slc25a28  | solute carrier family 25, member 28                               |
| 19 | - | 61304831 | Csf2ra    | colony stimulating factor 2 receptor, alpha (GM-CSFRalpha)        |
| 20 | + | 7367575  | Gripap1   | GRIP1 associated protein 1                                        |
| 20 | - | 9240152  | Dynlt3    | dynein light chain Tctex-type 3                                   |
| 20 | + | 45462578 | Xpnpep2   | X-prolyl aminopeptidase P 2, membrane-bound                       |
| 20 | + | 70473370 | F8a       | factor 8-associated gene A                                        |

|    |   |           |        |                                                    |
|----|---|-----------|--------|----------------------------------------------------|
| 20 | + | 71500136  | Emd    | emerin                                             |
| 20 | + | 91479480  | Klhl15 | kelch-like 15 (Drosophila)                         |
| 20 | - | 99701525  | Hdac8  | histone deacetylase 8                              |
| 20 | - | 105860338 | Gm379  | predicted gene 379                                 |
| 20 | + | 109424960 | Apool  | apolipoprotein O-like                              |
| 20 | + | 132673518 | Bex4   | brain expressed gene 4                             |
| 20 | - | 139830238 | Chrdl1 | chordin-like 1                                     |
| 20 | + | 147956506 | Phf8   | PHD finger protein 8                               |
| 20 | - | 165626382 | Amelx  | amelogenin X chromosome                            |
| 21 | - | 623085    | Ddx3y  | DEAD (Asp-Glu-Ala-Asp) box polypeptide 3, Y-linked |

**Table S3** Ontogeny of Human Genes with  
TGACGCAA between -2 kb and +1 kb

Nucleic acid metabolic process  
Nucleic acid binding  
RNA binding  
Nucleus  
Gene expression  
Transport  
Localization  
Cellular localization  
Establishment of localization in cell  
Organelle part  
Cytoplasmic part  
Intracellular organelle part  
Biosynthetic process  
Macromolecule biosynthetic process  
Macromolecular complex
